# Supplementary material for: Mapping of Gene Expression Reveals CYP27A1 as a Susceptibility Gene for Sporadic ALS
Source: PubMed Central journal article supplement (PMC3324559; doi:10.1371/journal.pone.0035333), 2012-04-11
Supplement: pone.0035333.s006.pdf [file pone.0035333.s006.pdf]

|             | n   | Gender, female |    | Age, mean |
|-------------|-----|----------------|----|-----------|
|             |     | n              | %  | y         |
| Discovery   |     |                |    |           |
| ALS cases   | 162 | 61             | 38 | 63.9      |
| Controls    | 207 | 90             | 43 | 62.7      |
| Replication |     |                |    |           |
| ALS cases   | 161 | 67             | 42 | 63.6      |
| Controls    | 206 | 97             | 47 | 62.0      |
| Total       | 736 | 315            | 43 | 63.2      |

ALS, amyotrophic lateral sclerosis.
