# Supplementary material for: Mapping of Gene Expression Reveals CYP27A1 as a Susceptibility Gene for Sporadic ALS
Source: PubMed Central journal article supplement (PMC3324559; doi:10.1371/journal.pone.0035333), 2012-04-11
Supplement: pone.0035333.s010.pdf [file pone.0035333.s010.pdf]

| Dataset         |                                  | Pre QC |      | QC SNPs |        |      |      | QC samples |                 |                      |              |           |                |           | After QC                    |     |      |      |        |
|-----------------|----------------------------------|--------|------|---------|--------|------|------|------------|-----------------|----------------------|--------------|-----------|----------------|-----------|-----------------------------|-----|------|------|--------|
| Cohort, country | Source                           | ALS    | CON  | SNPs    | Common | MAF  | HWE  | Call rate  | Missing ALS/CON | Missing by haplotype | Dupli- cates | Call rate | Hetero- zygoty | Sex check | Related Population outliers | ALS | CON  | SNPs |        |
| Discovery       |                                  |        |      |         |        |      |      |            |                 |                      |              |           |                |           |                             |     |      |      |        |
| Netherlands     | UMC Utrecht                      | 461    | 450  | 317503  | 311395 | 8131 | 3440 | 4091       | 22040           | 5891                 | 0            | 3         | 10             | 3         | 3                           | 6   | 450  | 436  | 268952 |
| Netherlands     | UMC Utrecht                      | 582    | 629  | 370404  | 311395 | 8131 | 3440 | 4091       | 22040           | 5891                 | 8            | 8         | 2              | 5         | 8                           | 17  | 566  | 597  | 268952 |
| Netherlands     | UMC Utrecht                      | 0      | 5974 | 561466  | 311395 | 8131 | 3440 | 4091       | 22040           | 5891                 | 14           | 0         | 7              | 3         | 534                         | 20  | 0    | 5396 | 268952 |
| Netherlands     | RS-I cohort, The Rotterdam Study | 0      | 704  | 561466  | 311395 | 8131 | 3440 | 4091       | 22040           | 5891                 | 1            | 2         | 11             | 32        | 10                          | 8   | 0    | 640  | 268952 |
| Belgium         | University Hospital Gasthuisberg | 300    | 328  | 370404  | 311395 | 8131 | 3440 | 4091       | 22040           | 5891                 | 3            | 27        | 11             | 8         | 3                           | 2   | 300  | 328  | 268952 |
| Sweden          | Umeå University Hospital         | 458    | 455  | 370404  | 311395 | 8131 | 3440 | 4091       | 22040           | 5891                 | 8            | 0         | 23             | 15        | 12                          | 22  | 458  | 455  | 268952 |
| Ireland         | Beaumont Hospital, Dublin        | 220    | 209  | 561466  | 311395 | 8131 | 3440 | 4091       | 22040           | 5891                 | 0            | 0         | 2              | 0         | 0                           | 1   | 220  | 209  | 268952 |
| USA             | NIH                              | 267    | 267  | 555351  | 311395 | 8131 | 3440 | 4091       | 22040           | 5891                 | 3            | 1         | 6              | 0         | 0                           | 3   | 267  | 267  | 268952 |
| Total           |                                  | 2261   | 8328 |         | 311395 | 8131 | 3440 | 4091       | 22040           | 5891                 | 37           | 41        | 72             | 66        | 570                         | 79  | 2261 | 8328 | 268952 |
| Replication     |                                  |        |      |         |        |      |      |            |                 |                      |              |           |                |           |                             |     |      |      |        |
| France          | Evry                             | 251    | 724  | 307790  | 301686 | 7735 | 2060 | 12579      | 9839            | 4571                 | 0            | 19        | 6              | 4         | 0                           | 6   | 231  | 709  | 266492 |
| UK              | King's College London            | 245    | 221  | 307790  | 301686 | 7735 | 2060 | 12579      | 9839            | 4571                 | 0            | 0         | 4              | 6         | 0                           | 5   | 239  | 212  | 266492 |
| USA             | MGH & Atlanta                    | 753    | 811  | 307790  | 301686 | 7735 | 2060 | 12579      | 9839            | 4571                 | 0            | 0         | 12             | 11        | 0                           | 14  | 736  | 791  | 266492 |
| Ireland         | Beaumont Hospital, Dublin        | 103    | 127  | 620901  | 301686 | 7735 | 2060 | 12579      | 9839            | 4571                 | 5            | 0         | 0              | 1         | 0                           | 0   | 101  | 123  | 266492 |
| Total           |                                  | 1352   | 1883 |         | 301686 | 7735 | 2060 | 12579      | 9839            | 4571                 | 5            | 19        | 22             | 22        | 0                           | 25  | 1307 | 1835 | 266492 |

QC, quality control; ALS, amyotrophic lateral sclerosis; CON, control; MAF, minor allele frequency; HWE, Hardy-Weinberg Equilibrium.
