# Supplementary material for: Mapping of Gene Expression Reveals CYP27A1 as a Susceptibility Gene for Sporadic ALS
Source: PLOS journal article supplement (doi:10.1371/journal.pone.0035333), 2012-04-11
Supplement: S9 (10.1371/journal.pone.0035333.s009) [file journal.pone.0035333.s009]

| Study                      | Sample size | Tissue                      | n genes mapped by <i>cis</i> eQTLs |       | Overlapping results |      |
|----------------------------|-------------|-----------------------------|------------------------------------|-------|---------------------|------|
|                            | n           |                             | sign. threshold                    | n     | n                   | %    |
| This study, two stages     | 369 + 367   | Whole blood                 | permuted p FDR 0.05                | 2,211 | –                   | –    |
| Göring <i>et al.</i> [1]   | 1,240       | Lymphocytes                 | LOD score >3                       | 737   | 332                 | 45.0 |
| Stranger <i>et al.</i> [2] | 270         | Lymphoblastoid cell lines   | permuted p<0.001                   | 299   | 122                 | 40.8 |
| Webster <i>et al.</i> [3]  | 364         | Brain cortex                | permuted p<0.05                    | 280   | 103                 | 36.8 |
| Gibbs <i>et al.</i> [4]    | 600         | Four regions in human brain | FDR 0.05                           | 281   | 146                 | 52.0 |

Comparison of the number of genes mapped by *cis* eQTLs in the present study and four other studies that have looked into the genetics of gene expression. The number of genes mapped by *cis* eQTLs was based on the significance threshold that was used in each of the studies. eQTL, expression quantitative trait locus; FDR, false discovery rate; LOD, logarithm of odds.

## References

1. Göring HHH, Curran JE, Johnson MP, Dyer TD, Charlesworth J, et al. (2007) Discovery of expression QTLs using large-scale transcriptional profiling in human lymphocytes. *Nat Genet* 39: 1208-1216.
2. Stranger BE, Forrest MS, Clark AG, Minichiello MJ, Deutsch S, et al. (2005) Genome-wide associations of gene expression variation in humans. *PLoS Genet* 1: e78.
3. Webster JA, Gibbs JR, Clarke J, Ray M, Zhang W, et al. (2009) Genetic control of human brain transcript expression in Alzheimer disease. *Am J Hum Genet* 84: 445-458.
4. Gibbs JR, van der Brug MP, Hernandez DG, Traynor BJ, Nalls MA, et al. (2010) Abundant quantitative trait loci exist for DNA methylation and gene expression in human brain. *PLoS Genet* 6: e1000952.
